# Supplementary material for: Exploring KTiPO4F as a robust polyanion anode material for potassium-ion batteries
Source: Royal Society of Chemistry journal article supplement (doi:10.1039/d3ta08103f), 2024-01-01
Supplement: d3ta08103f1.pdf [file d3ta08103f1.pdf]

## Exploring $\text{KTiPO}_4\text{F}$ as an anode material for potassium-ion batteries

Vahid Ramezankhani,<sup>\*,a</sup> Nikita D. Luchinin,<sup>b</sup> Sergey N. Marshenya,<sup>b</sup> Maxim V. Zakharkin,<sup>c</sup> Alexander A. Golubnichiy,<sup>b</sup> Anatolii V. Morozov,<sup>b</sup> Olga Emilianova,<sup>b</sup> Keith J. Stevenson,<sup>c</sup> Evgeny V. Antipov,<sup>b,c</sup> Artem M. Abakumov,<sup>b</sup> and Stanislav S. Fedotov<sup>\*,b</sup>

<sup>a</sup> Electrochemical Society Member

<sup>b</sup> Skoltech Center for Energy Science and Technology, Skolkovo Institute of Science and Technology, Nobel str. 3, Moscow 121205, Russia.

<sup>c</sup> Department of Chemistry, Lomonosov Moscow State University, Leninskie gory 1/3, Moscow, 119991, Russia

Table S1. EDX elemental composition of the pristine powder sample

| Spectrum number   | K, at.%      | Ti, at.%     | P, at.%      |
|-------------------|--------------|--------------|--------------|
| 1                 | 31.17        | 34.42        | 34.41        |
| 2                 | 29.50        | 35.25        | 35.25        |
| 3                 | 30.67        | 34.67        | 34.66        |
| 4                 | 29.5         | 35.25        | 35.25        |
| 5                 | 30.63        | 34.69        | 34.68        |
| 6                 | 29.29        | 35.35        | 35.36        |
| 7                 | 31.46        | 34.27        | 34.27        |
| 8                 | 31.32        | 34.35        | 34.34        |
| 9                 | 32.19        | 33.9         | 33.91        |
| 10                | 32.09        | 33.95        | 33.96        |
| 11                | 32.03        | 33.99        | 33.99        |
| 12                | 33.48        | 33.26        | 33.26        |
| 13                | 31.78        | 34.11        | 34.11        |
| 14                | 25.76        | 37.12        | 37.12        |
| 15                | 33.08        | 33.46        | 33.45        |
| 16                | 33.48        | 33.27        | 33.26        |
| 17                | 31.21        | 34.4         | 34.39        |
| 18                | 32.27        | 33.87        | 33.86        |
| 19                | 35.95        | 32.03        | 32.02        |
| 20                | 31.26        | 34.38        | 34.37        |
| 21                | 29.97        | 35.01        | 35.02        |
| 22                | 29.48        | 35.26        | 35.26        |
| 23                | 29.07        | 35.47        | 35.46        |
| 24                | 29.36        | 35.32        | 35.32        |
| 25                | 35.46        | 32.27        | 32.27        |
| <b>Avg.</b>       | <b>31.26</b> | <b>34.37</b> | <b>34.37</b> |
| <b>Std. error</b> | <b>0.4</b>   | <b>0.2</b>   | <b>0.2</b>   |

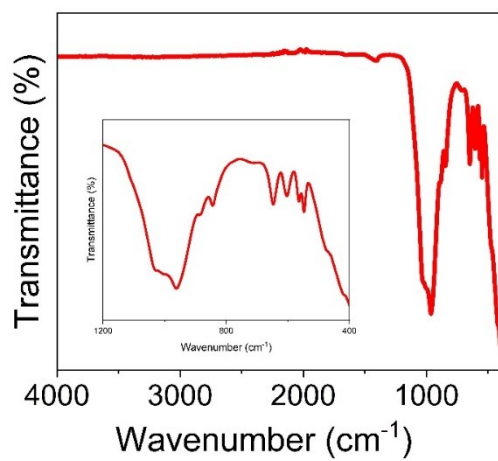

Fig. S1 FTIR spectrum of pristine KTPF powder in the range of 4000-400 cm<sup>-1</sup> range (Inset: the enlarged spectrum in the range of 1200-400 cm<sup>-1</sup>).

Table S2. The comparison of potassium atom position, fraction, and thermal displacement of the current study (the black colour) with the previous report (the red colour).<sup>1</sup>

| Atoms | X, Å       | Y, Å       | Z, Å       | Fraction  | U <sub>iso</sub> (Å <sup>2</sup> ) |
|-------|------------|------------|------------|-----------|------------------------------------|
| K1    | 0.3762(7)  | 0.7786(1)  | 0.3057(9)  | 0.709(5)  | 0.019(7)                           |
| K1'   | 0.4122(7)  | 0.8524(13) | 0.4428(7)  | 0.260(7)  | 0.014(4)                           |
| K2    | 0.1130(9)  | 0.6582(13) | 0.0235(11) | 0.176(6)  | 0.040(2)                           |
| K2_   | 0.0892(3)  | 0.6873(5)  | 0.1659(5)  | 0.300(7)  | 0.045(4)                           |
| K2'_  | 0.1093(2)  | 0.7230(3)  | 0.0733(5)  | 0.576(7)  | 0.017(3)                           |
| K1    | 0.3789(5)  | 0.7798(9)  | 0.3045(8)  | 0.732(7)  | 0.016(2)                           |
| K1'   | 0.3999(17) | 0.830(3)   | 0.4330(19) | 0.268(7)  | 0.016(2)                           |
| K2    | 0.086(2)   | 0.632(5)   | -0.012(3)  | 0.151(10) | 0.033(3)                           |
| K2_   | 0.0875(13) | 0.703(3)   | 0.158(2)   | 0.264(13) | 0.033(3)                           |
| K2'_  | 0.01051(8) | 0.7258(17) | 0.0678(12) | 0.585(17) | 0.033(3)                           |

Table S3. Atomic positions, occupancies, and ADPs for  $\text{KTiPO}_4\text{F}$ 

| Atoms |    | x, Å       | y, Å       | z, Å       | Fraction | $U_{\text{iso}}$ , Å <sup>2</sup> |
|-------|----|------------|------------|------------|----------|-----------------------------------|
| K1    | K  | 0.3762(7)  | 0.7786(1)  | 0.3057(9)  | 0.709(5) | 0.019(7)                          |
| K1'   | K  | 0.4122(7)  | 0.8524(13) | 0.4428(7)  | 0.260(7) | 0.014(4)                          |
| K2    | K  | 0.1130(9)  | 0.6582(13) | 0.0235(11) | 0.176(6) | 0.040(2)                          |
| K2_   | K  | 0.0892(3)  | 0.6873(5)  | 0.1659(5)  | 0.300(7) | 0.045(4)                          |
| K2'_  | K  | 0.1093(2)  | 0.7230(3)  | 0.0733(5)  | 0.576(7) | 0.017(3)                          |
| Ti1   | Ti | 0.3867(2)  | 0.4951(9)  | 0.0022(7)  | 1        | 0.0255(6)                         |
| Ti2   | Ti | 0.2448(4)  | 0.2574(10) | 0.2564(9)  | 1        | 0.0255(6)                         |
| P1    | P  | 0.5002(7)  | 0.3292(5)  | 0.2573(11) | 1        | 0.0157(8)                         |
| P2    | P  | 0.1798(3)  | 0.5039(15) | 0.5054(13) | 1        | 0.0157(8)                         |
| O1    | O  | 0.4758(7)  | 0.4903(18) | 0.1545(11) | 1        | 0.0080(12)                        |
| O2    | O  | 0.4981(12) | 0.4567(17) | 0.3803(11) | 1        | 0.0080(12)                        |
| O3    | O  | 0.4045(8)  | 0.2017(18) | 0.2804(16) | 1        | 0.0080(12)                        |
| O4    | O  | 0.5953(8)  | 0.1893(18) | 0.2386(14) | 1        | 0.0080(12)                        |
| O5    | O  | 0.1220(10) | 0.3082(16) | 0.5454(13) | 1        | 0.0080(12)                        |
| O6    | O  | 0.1066(10) | 0.6862(16) | 0.4842(14) | 1        | 0.0080(12)                        |
| O7    | O  | 0.2574(10) | 0.540(3)   | 0.6112(13) | 1        | 0.0080(12)                        |
| O8    | O  | 0.2459(11) | 0.463(3)   | 0.3889(12) | 1        | 0.0080(12)                        |
| F1    | F  | 0.2706(12) | 0.534(3)   | 0.8845(13) | 1        | 0.0208(19)                        |
| F2    | F  | 0.2752(11) | 0.494(3)   | 0.1308(12) | 1        | 0.0208(19)                        |

Table S4. Selected interatomic distances for  $\text{KTiPO}_4\text{F}$ 

| Bond   | Distance, Å | Bond   | Distance, Å |
|--------|-------------|--------|-------------|
| Ti1-O1 | 2.008(2)    | Ti2-O3 | 2.123(1)    |
| Ti1-O2 | 2.015(2)    | Ti2-O4 | 1.983(3)    |
| Ti1-O5 | 2.070(1)    | Ti2-O7 | 2.097(2)    |
| Ti1-O6 | 1.998(3)    | Ti2-O8 | 1.945(9)    |
| Ti1-F1 | 1.987(7)    | Ti2-F1 | 2.001(8)    |
| Ti1-F2 | 2.005(6)    | Ti2-F2 | 2.073(10)   |
| P1-O1  | 1.549(7)    | P2-O5  | 1.528(8)    |
| P1-O2  | 1.558(6)    | P2-O6  | 1.527(2)    |
| P1-O3  | 1.511(9)    | P2-O7  | 1.539(2)    |
| P1-O4  | 1.542(4)    | P2-O8  | 1.543(9)    |

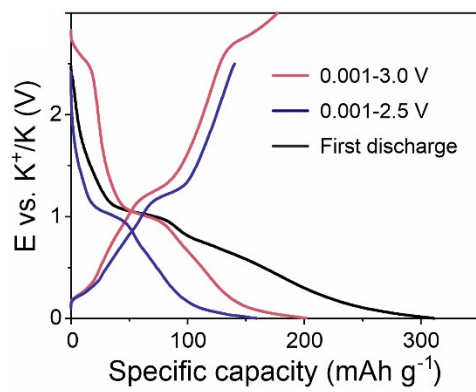

Fig. S2 Galvanostatic charge and discharge profiles in the potential range of 0.001-3.0 V and 0.001-2.5 V including the first discharge.

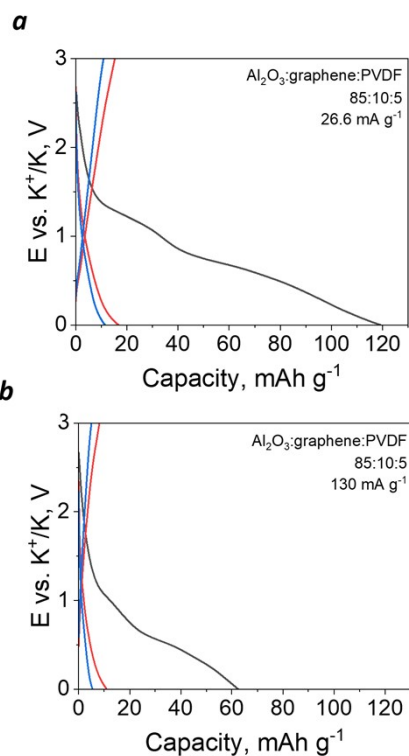

Fig. S3 The contribution of graphene nanoplate (GN) to the capacity at a) the current density  $26.6 \text{ mA g}^{-1}$  (C/5 rate) and b) current density  $130 \text{ mA g}^{-1}$  (C rate).

Table S5. O:F ratio in pristine  $\text{KTiPO}_4\text{F}$  powder sample calculated from EDX analysis.

| Spectrum number  | O, at. %    | F, at. %    |
|------------------|-------------|-------------|
| 1                | 80.5        | 19.5        |
| 2                | 80.7        | 19.4        |
| 3                | 80.9        | 19.1        |
| 4                | 80.5        | 19.5        |
| 5                | 80.9        | 19.1        |
| 6                | 80.2        | 19.8        |
| 7                | 80.6        | 19.4        |
| 8                | 80.9        | 19.1        |
| 9                | 80.0        | 20.0        |
| 10               | 80.4        | 19.6        |
| 11               | 80.3        | 19.7        |
| 12               | 80.7        | 19.3        |
| 13               | 80.8        | 19.3        |
| 14               | 80.8        | 19.2        |
| 15               | 79.6        | 20.4        |
| 16               | 80.0        | 20.0        |
| 17               | 80.6        | 19.5        |
| 18               | 80.6        | 19.4        |
| 19               | 79.8        | 20.2        |
| 20               | 79.9        | 20.1        |
| <b>Avg.</b>      | <b>80.4</b> | <b>19.6</b> |
| <b>Std. dev.</b> | <b>0.4</b>  | <b>0.4</b>  |

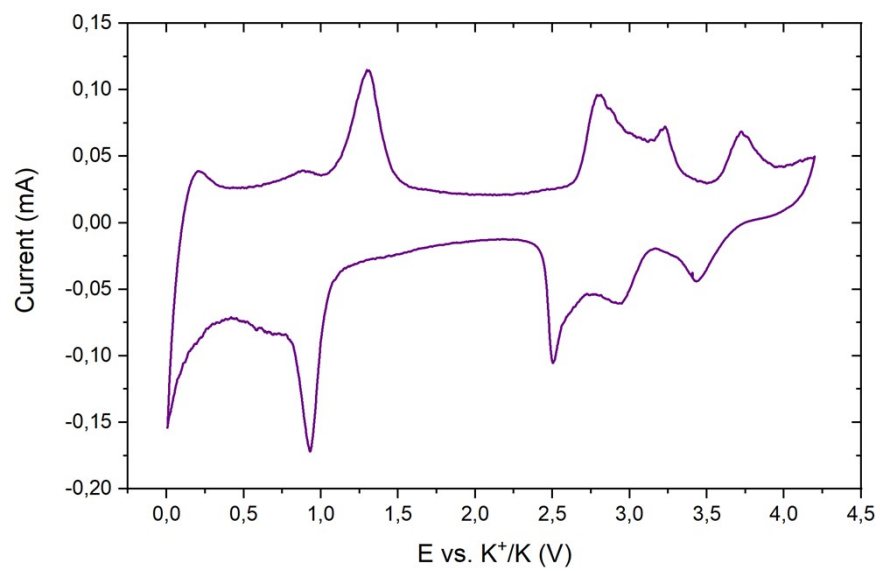

Fig. S4 Cyclic voltammogram of KTPF in the 0.001 – 4.2 V potential range at  $100 \mu\text{V s}^{-1}$  scan rate.



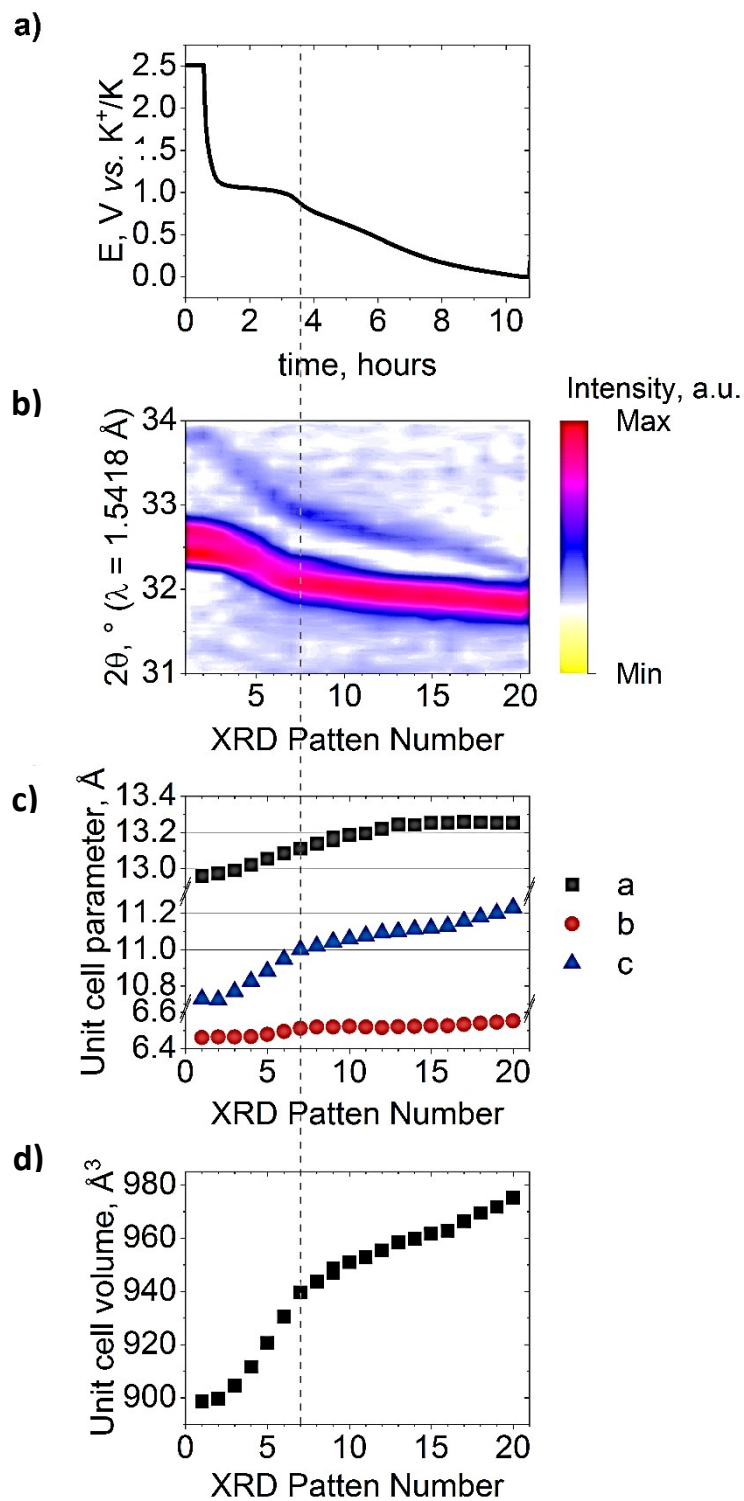

Fig. S5 Phase and cell parameters alteration study of KTPF||K cell during *operando* XRD study b) *operando* XRD patterns at the angle of 31-33 (degrees), 411 and 221 reflections c)  $a$ ,  $b$  and  $c$  parameter change upon intercalation of K-ion d) Unit cell volume change trend during *operando* XRD measurement.

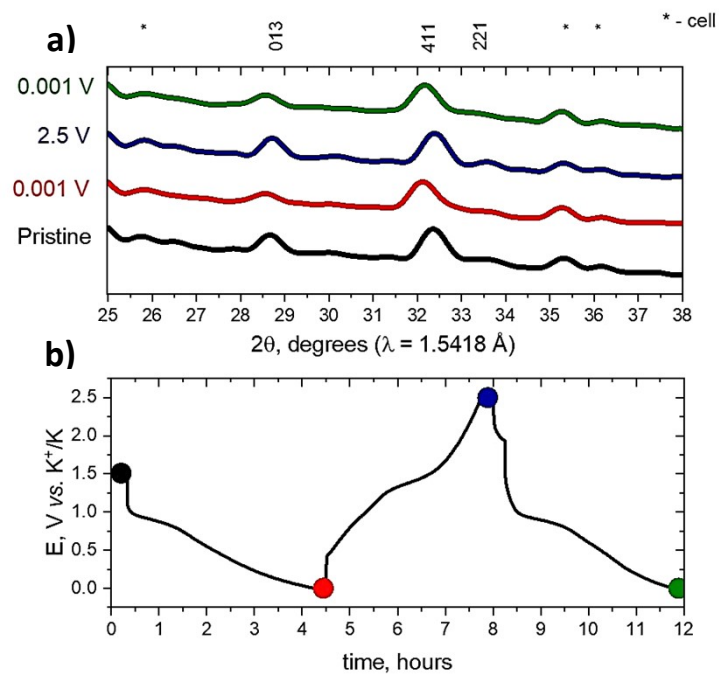

Fig. S6 The reversibility study of KTPF//K cell with operando XRD a) the recorded operando XRD patterns b) discharge and charge of the pre-cycled half-cell from OCV. The star sign (\*) marks the reflections from the cell components (which remain unchanged during the operando experiment).

Table S6. The comprehensive comparison of KTPF with the reported polyanion benchmarks.

| Active material (Structure)                                                                           | Theoretical capacity (mAh g <sup>-1</sup> ) | Electrode composition (weight ratio)<br>AM = active material | Electrolyte formulation                          | Reversible capacity (mAh g <sup>-1</sup> ) @current (mA g <sup>-1</sup> ) | Potential window (V) | Capacity retention (%), cycles @ current density (mA g <sup>-1</sup> ) | ICE (%) | Ref  |
|-------------------------------------------------------------------------------------------------------|---------------------------------------------|--------------------------------------------------------------|--------------------------------------------------|---------------------------------------------------------------------------|----------------------|------------------------------------------------------------------------|---------|------|
| This work (Orthorhombic)                                                                              | 133                                         | AM:G: PVdF=8.5:1:0.5                                         | 1 M KPF <sub>6</sub> in EC:PC (1:1 v/v)          | 205 @ 26.6                                                                | 0.001-3              | 99, 1000 @ 130                                                         | 57      |      |
| KVPO <sub>4</sub> F (Orthorhombic)                                                                    | 131.4                                       | AM:SP: PVdF=7:2:1                                            | 1 M KPF <sub>6</sub> in EC:PC (1:1 v/v)          | 105 @ 100                                                                 | 0-3                  | 91, 100 @ 100                                                          | 51      | [2]  |
| K <sub>0.76</sub> V <sub>0.55</sub> Nb <sub>0.45</sub> OPO <sub>4</sub> (Orthorhombic)                | 97                                          | AM:SP: CMC=8:1:1                                             | 5 M KFSI in DEGDME                               | 82.6 @ 3                                                                  | 0.1-1.8              | 66.4, 550 @ 5                                                          | 53      | [3]  |
| K <sub>2.13</sub> V <sub>1.52</sub> Ti <sub>0.48</sub> (PO <sub>4</sub> ) <sub>3</sub> (Orthorhombic) | 137                                         | AM:SP: CMC=8:1:1                                             | 5 M KFSI in DEGDME                               | 136 @ 10                                                                  | 0.01-2.5             | 69.3, 1000 @ 100                                                       | 49.63   | [4]  |
| KTiOPO <sub>4</sub> -rGO (Orthorhombic)                                                               | 135                                         | AM:AB: SA =8:1:1                                             | 1 mol dm <sup>-3</sup> KFSA in EC: DEC (1:1 v/v) | 125 @ 10                                                                  | 0.1-2.5              | 84, 70 @ 20                                                            | 67      | [5]  |
| KTiOPO <sub>4</sub> (Orthorhombic)                                                                    | 150                                         | N/A                                                          | N/A                                              | 176.7 @ 30                                                                | 0-3                  | 78.4, 10000 @ 3000                                                     | 51.5    | [6]  |
| K <sub>2</sub> Ti <sub>8</sub> O <sub>17</sub> (Monoclinic)                                           | 308                                         | AM:SP: PVDF=7:2:1                                            | 0.8 M KPF <sub>6</sub> EC:DEC (1:1 v/v)          | 109 @20                                                                   | 0.01-3               | 62.7, 50 @ 20                                                          | 57      | [7]  |
| K <sub>2</sub> Ti <sub>4</sub> O <sub>9</sub> (Monoclinic)                                            | 129                                         | AM:AB: PVDF=7:2:1                                            | 1 M KPF <sub>6</sub> in EC:PC (1:1 v/v)          | 90 @30                                                                    | 0-2.5                | 47.3, 30 @ 100                                                         | 18      | [8]  |
| K <sub>2</sub> Ti <sub>4</sub> O <sub>9</sub> (Monoclinic)                                            | 129                                         | AM: PVDF=7:2:1                                               | 1M KPF <sub>6</sub> in Diglyme                   | 122 @ 20                                                                  | 0.01-3               | 61, 100 @ 50                                                           | 23%     | [9]  |
| H-TiO <sub>2</sub> -C MTs (Hetero-structure)                                                          | N/A                                         | N/A                                                          | 0.8 M KPF <sub>6</sub> In EC:DEC (1:1 v/v)       | 197.5 @ 200                                                               | 0.01-3.0.            | 81.3, 1200 @ 500                                                       | 49.1    | [10] |
| KTi <sub>2</sub> (PO <sub>4</sub> ) <sub>3</sub> @C or (KTPO@C) (Rhombohedral)                        | N/A                                         | AM:SP:CMC=7:2:1                                              | 0.8 M KPF <sub>6</sub> in EC/DEC (1:1 v/v)       | 250 @ 20                                                                  | 0.01-3.              | 34, 1000 @ 1000                                                        | 64.5    | [11] |
| π-Ti <sub>2</sub> O(PO <sub>4</sub> ) <sub>2</sub>                                                    | N/A                                         | AM: SP:CMC=8:1:1                                             | 3 M KFSI in 1,2-DME                              | 224 @ 100                                                                 | 0.01-3               | 82.5, 2000 @ 1000                                                      | 55.5    | [12] |
| CrPO <sub>4</sub> @NC (Orthorhombic)                                                                  | N/A                                         | AM: AB: PVDF= 7:2:1                                          | 1 M KFSI in EC: DEC (1:1 v/v)                    | 300 @ 50                                                                  | 0.01-3.0             | 74.3, 100 @ 200                                                        | 43.1    | [13] |
| VPO <sub>4</sub> (Amorphous)                                                                          | 550                                         | AM:AB: CMC=7:2:1                                             | 3 M KFSI in DME                                  | 390 @ 50                                                                  | 0.01-3.0             | 90, 500 @ 500                                                          | 63.8    | [14] |
| TiP <sub>2</sub> O <sub>7</sub> (Cubic)                                                               | N/A                                         | AM:SP: PVDF=8:1:1                                            | 0.8 M KPF <sub>6</sub> in EC:DEC (1:1 v/v)       | 321 @ 100                                                                 | 0.01-3               | 56, 5000 @ 1000                                                        | 45      | [15] |
| Co <sub>2</sub> P <sub>2</sub> O <sub>7</sub> /C (N/A)                                                | N/A                                         | AM:SP: CMC=7:2:1                                             | 1 M KFSI in DME                                  | 441 @ 100                                                                 | 0.01-3               | 62, 900 @ 1000                                                         | N/A     | [16] |
| CoC <sub>2</sub> O <sub>4</sub> /CNTs (Monoclinic)                                                    | 400                                         | AM:SP: PAA=8:1:1                                             | 0.5 M KPF <sub>6</sub> in PC:FEC (98:2 v/v)      | 400 @ 100                                                                 | 0-3                  | 73, 200 @ 40                                                           | 51.5    | [17] |
| Co(PO <sub>3</sub> ) <sub>2</sub> NSs/CC (Monoclinic)                                                 | N/A                                         | 100% of AM                                                   | 0.8 M KPF <sub>6</sub> in EC:DEC (1:1 v/v)       | 700 @ 50                                                                  | 0-1.5                | 83, 50 @ 500                                                           | 57      | [18] |

Table S7: The comparison of half-cell specification of graphite, hard carbon, and KTPF.

| Anode materials     | Average potential, V | Theoretical Capacity, mAh g <sup>-1</sup> | Rate performance @ current rate | Long-cycling performance; (capacity, mAh g <sup>-1</sup> ) | Ref.             |
|---------------------|----------------------|-------------------------------------------|---------------------------------|------------------------------------------------------------|------------------|
| KTPF                | 0.8                  | 133.4                                     | 50 mAh g <sup>-1</sup> @ 7.5 C  | 1000 cycles @ 1C; (130)                                    | <b>This work</b> |
| Commercial graphite | 0.1                  | 279                                       | 50 mAh g <sup>-1</sup> @ 0.7 C  | 200 cycles @ 0.036 C; (80)                                 | 19               |
| Expanded graphite   | 0.1                  | 279                                       | 176 mAh g <sup>-1</sup> @ 0.7 C | 500 cycles @ 0.7 C; (176)                                  | 19               |
| Hard Carbon         | 0.3                  | 279                                       | 44.4 mAh g <sup>-1</sup> @ 10 C | 400 cycles @ 0.2 C (200)                                   | 20               |

## References

- 1 S. S. Fedotov, N. D. Luchinin, D. A. Aksyonov, A. V. Morozov, S. V. Ryazantsev, M. Gaboardi, J. R. Plaisier, K. J. Stevenson, A. M. Abakumov and E. V. Antipov, *Nat Commun*, 2020, **11**, 1–11.
- 2 H. Tan, X. Du, J. Q. Huang and B. Zhang, *Chemical Commun.*, 2019, **55**, 11311–11314.
- 3 J. Bao, W. Deng, J. Liu and C. F. Sun, *Energy Stor. Mater.*, 2021, **42**, 806–814.
- 4 W. Wang, Z. Kang, C. F. Sun and Y. Li, *Electrochem. Commun.*, 2022, **136**, 107247.
- 5 P. Ramesh Kumar, K. Kubota, D. Igarashi and S. Komaba, *J. Phys. Chem. C*, 2021, **125**, 24823–24830.
- 6 Y. Qi, J. Li, W. Zhong, S. Bao and M. Xu, *Chem. Eng. J.*, 2021, **417**, 128159.
- 7 J. Han, M. Xu, Y. Niu, G. N. Li, M. Wang, Y. Zhang, M. Jia and C. M. Li, *Chem. Commun.*, 2016, **52**, 11274–11276.
- 8 B. Kishore, V. G and N. Munichandraiah, *J Electrochem Soc*, 2016, **163**, A2551–A2554.
- 9 Y. Dong, Z.-S. Wu, S. Zheng, X. Wang, J. Qin, S. Wang, X. Shi and X. Bao, *ACS Nano*, 2017, **11**, 4792–4800.
- 10 Y. Li, C. Yang, F. Zheng, Q. Pan, Y. Liu, G. Wang, T. Liu, J. Hu and M. Liu, *Nano Energy*, 2019, **59**, 582–590.
- 11 J. Han, Y. Niu, S. J. Bao, Y. N. Yu, S. Y. Lu and M. Xu, *Chem. Commun.*, 2016, **52**, 11661–11664.
- 12 X. Sun, Z. Li, Z. Liu, X. Lv, K. Shi, R. Chen, F. Wu and L. Li, *Adv Funct Mater*, 2023, 2300125.
- 13 J. Hu, Y. Xie, J. Zheng, L. Zhang, H. Li, Y. Lai and Z. Zhang, *Electrochim. Acta*, 2022, **409**, 139996.
- 14 J. Liao, Q. Hu, J. Mu, X. He, S. Wang, D. Jiemin and C. Chen, *Chem. Commun.*, 2019, **55**, 13916–13919.
- 15 Z. Li, Y. Dong, J. Feng, T. Xu, H. Ren, C. Gao, Y. Li, M. Cheng, W. Wu and M. Wu, *ACS Nano*, 2019, **13**, 9227–9236.
- 16 Y. Zhang, Y. Zheng, H. Geng, Y. Yang, M. Ye, Y. Zhang and C. Chao Li, *Chem. Eur. J.*, 2021, **27**, 9031–9037.
- 17 C. H. Jo, J. H. Jo, J. U. Choi, H. Yashiro, H. Kim and S. T. Myung, *ACS Sustain Chem. Eng.*, 2020, **8**, 3743–3750.
- 18 H. He, L. Zeng, X. Li, J. Hao, D. Luo, J. He, W. Kang, Q. Wang, H. Wang and C. Zhang, *ACS Appl. Mater. Interfaces*, 2021, **13**, 34410–34418.
- 19 Y. An, H. Fei, G. Zeng, L. Ci, B. Xi, S. Xiong and J. Feng, *J Power Sources*, 2018, **378**, 66–72.
- 20 Z. Jian, S. Hwang, Z. Li, A. S. Hernandez, X. Wang, Z. Xing, D. Su and X. Ji, *Adv. Funct. Mater*, 2017, **27**, 1700324.
